# Supplementary material for: Binuclear metal complexes with a novel hexadentate imidazole derivative for the cleavage of phosphate diesters and biomolecules: distinguishable mechanisms
Source: Royal Society of Chemistry journal article supplement (doi:10.1039/d1qi00108f), 2021-01-01
Supplement: d1qi00108f1.pdf [file d1qi00108f1.pdf]

## Supporting Information

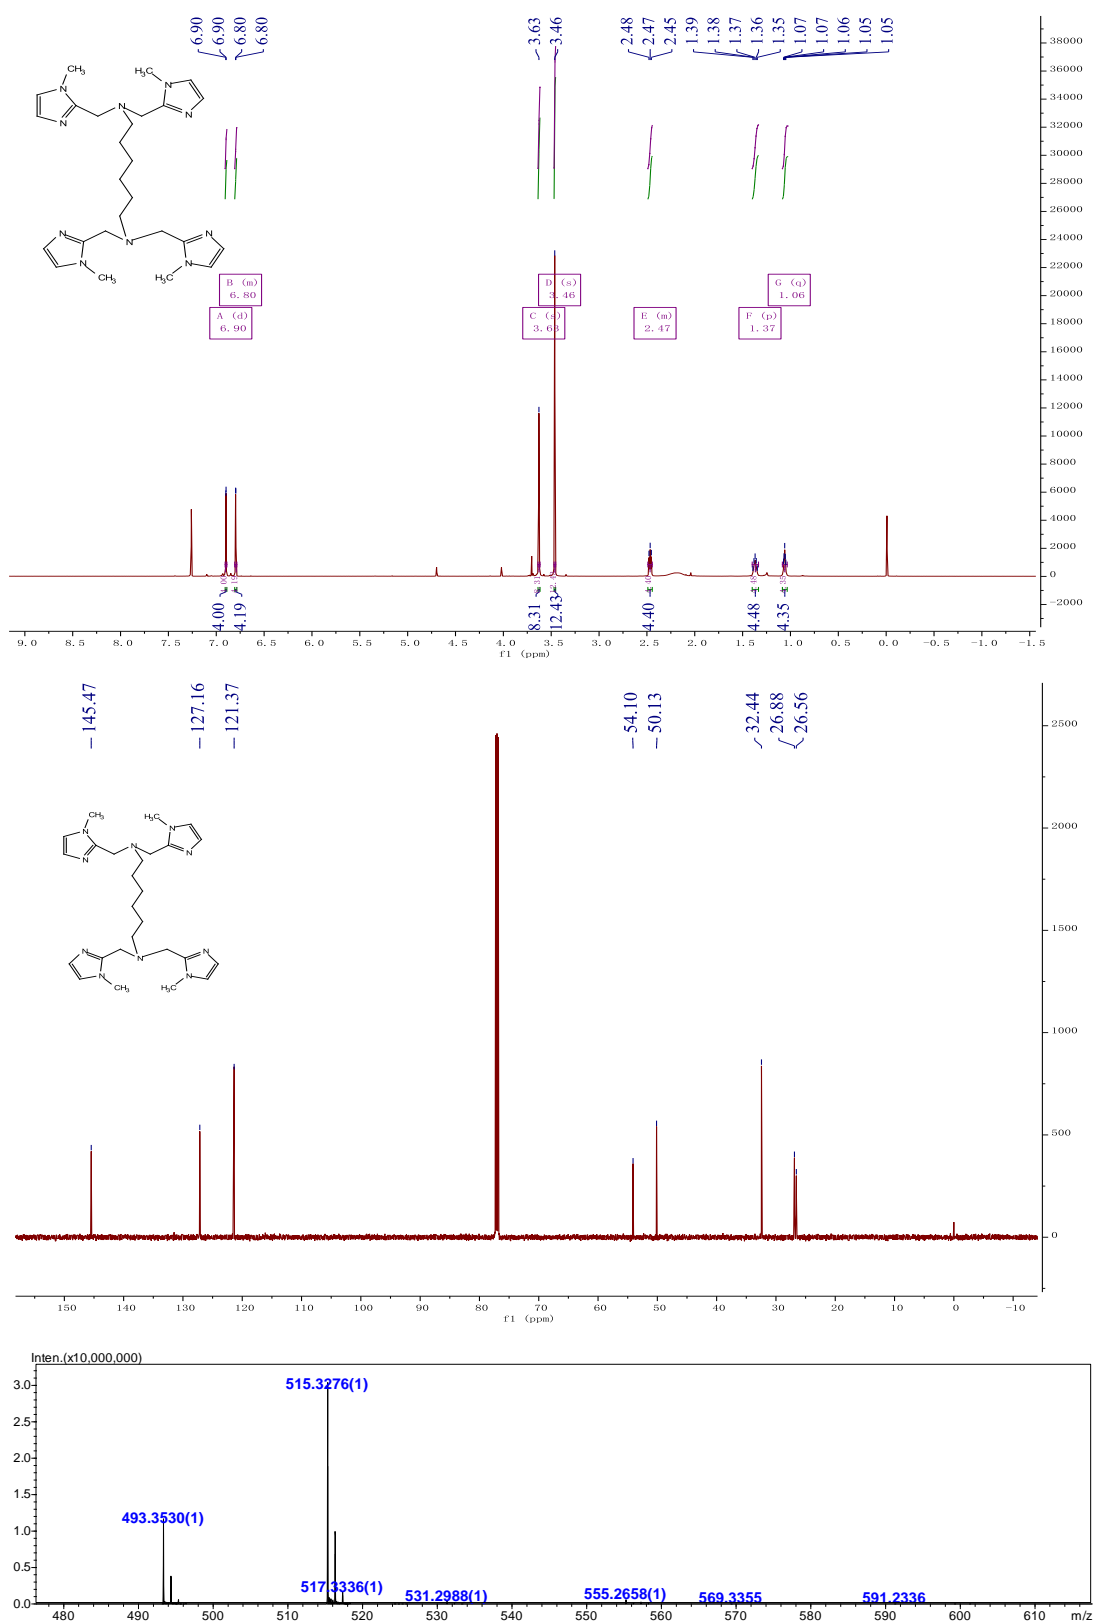

**Figure S1.**  $^1\text{H}$  NMR (A),  $^{31}\text{C}$  NMR (B) and ESI-MS (C) of hexadentate imidazole derivative (L) as the desired ligand for binuclear metal complexes.

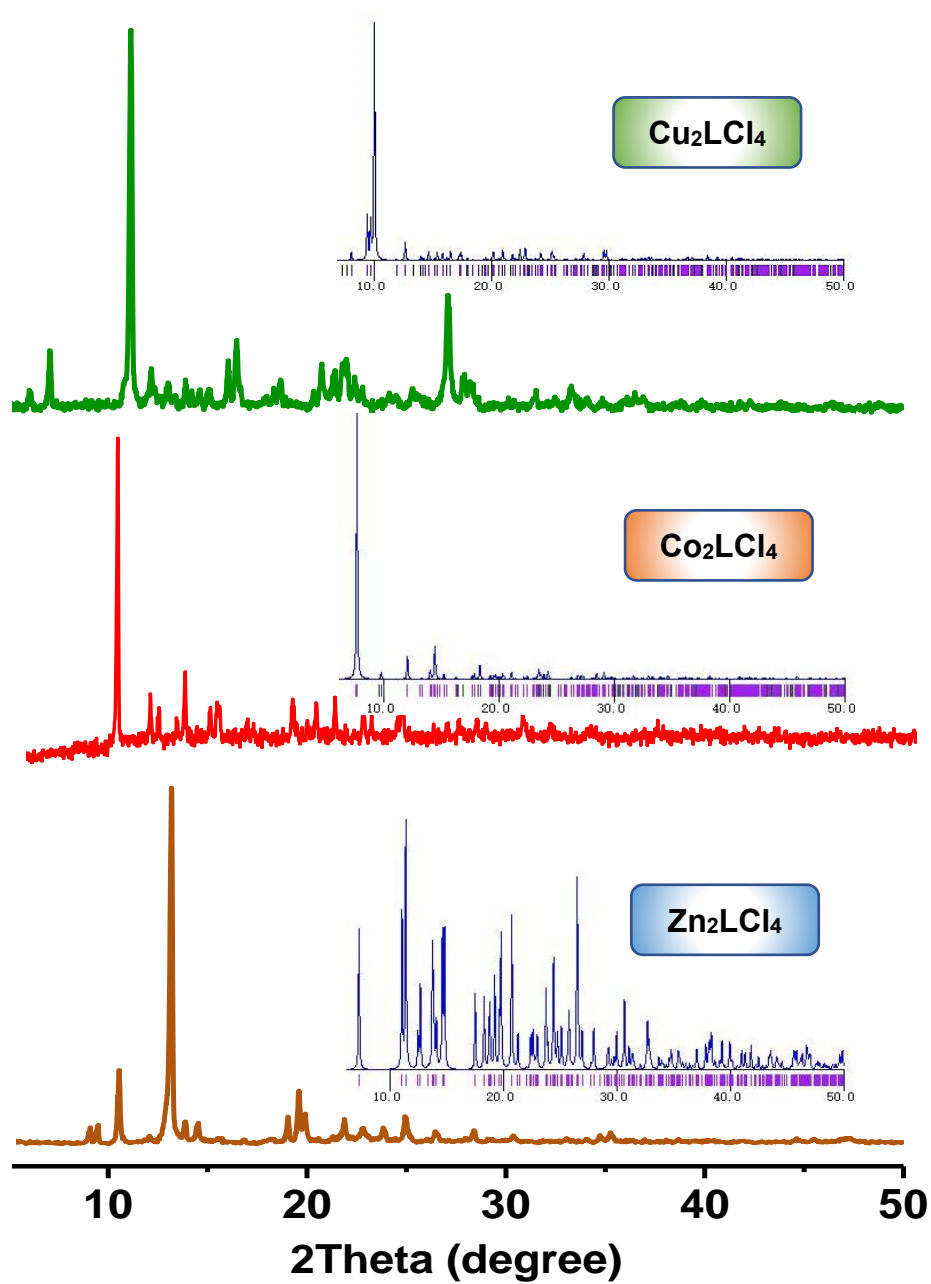

**Figure S2.** Collected PXR D patterns of three binuclear complexes ( $\text{Cu}_2\text{LCl}_4$ ,  $\text{Co}_2\text{LCl}_4$ ,  $\text{Zn}_2\text{LCl}_4$ ). The inserts are the simulated PXR D patterns from single crystal data.

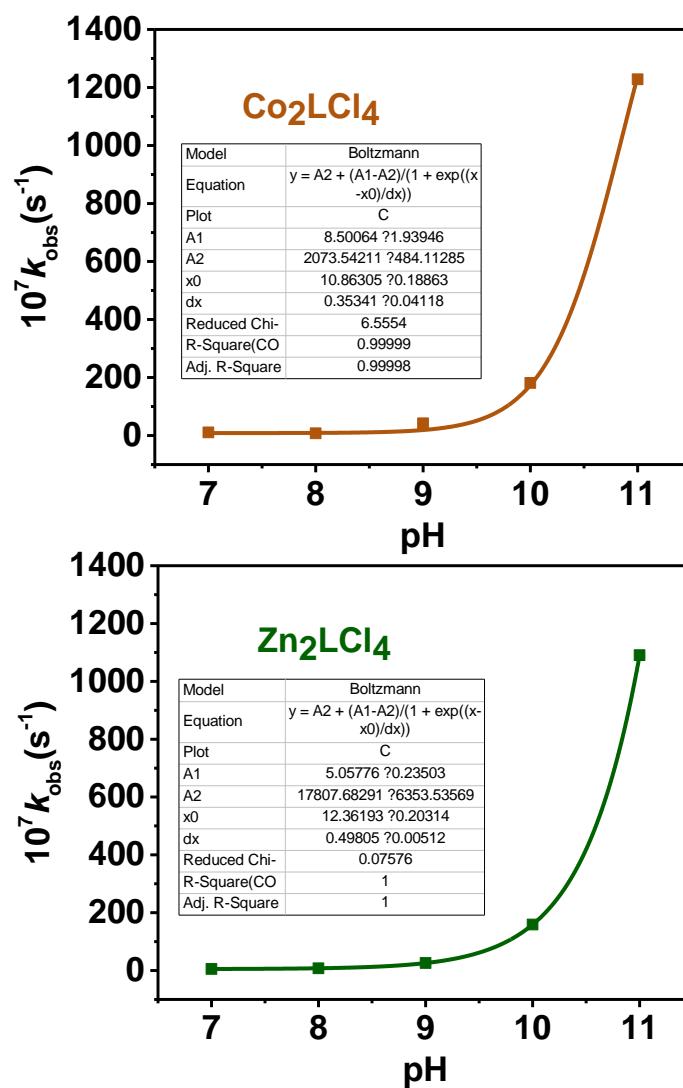

**Figure S3.** pH-Dependence of the transesterification rate of HPNP promoted by Co<sub>2</sub>LCl<sub>4</sub> or Zn<sub>2</sub>LCl<sub>4</sub>. Conditions: 25°C, [HPNP]=1.0×10<sup>-4</sup> mol/L, [complex]=5.0×10<sup>-5</sup> mol/L.

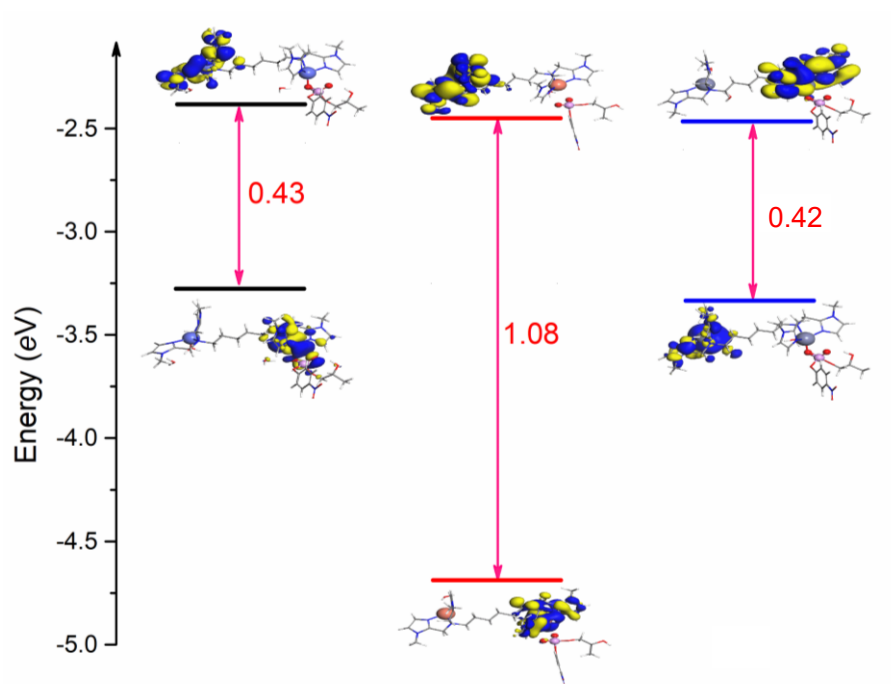

**Figure S4.** Calculated energies of HOMO, LUMO orbitals of three HPNP-catalyst binary complexes (left to right: HPNP-Co<sub>2</sub>LCl<sub>4</sub>, HPNP-Cu<sub>2</sub>LCl<sub>4</sub>, HPNP-Zn<sub>2</sub>LCl<sub>4</sub>).

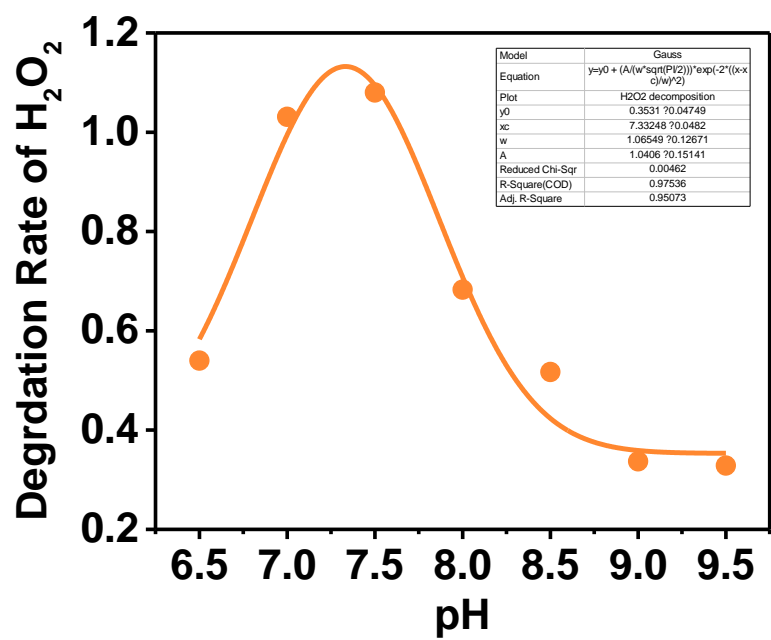

Figure S5. pH-dependent decomposition rate of H<sub>2</sub>O<sub>2</sub> catalyzed by Cu<sub>2</sub>LCl<sub>4</sub>.

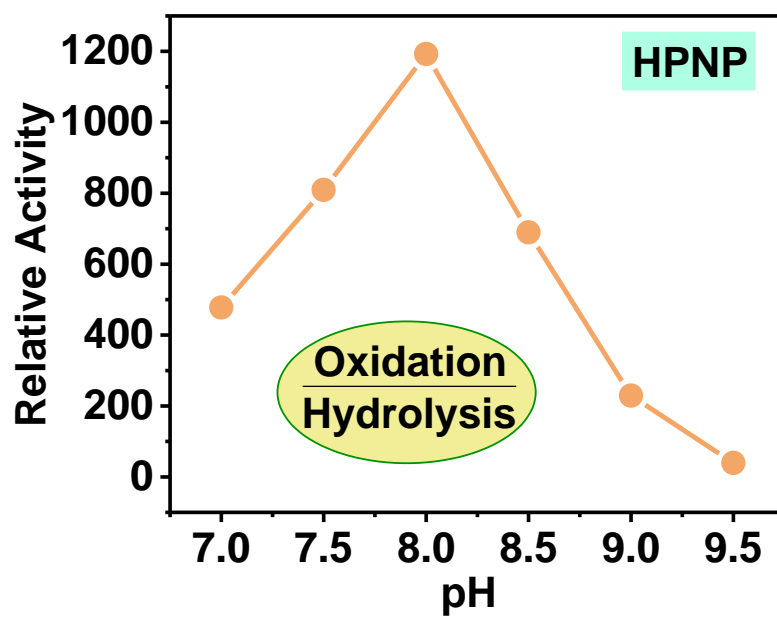

**Figure S6.** pH-Dependent relative rate of the oxidative cleavage to the hydrolytic one of HPNP promoted by  $\text{Cu}_2\text{LCl}_4$ .

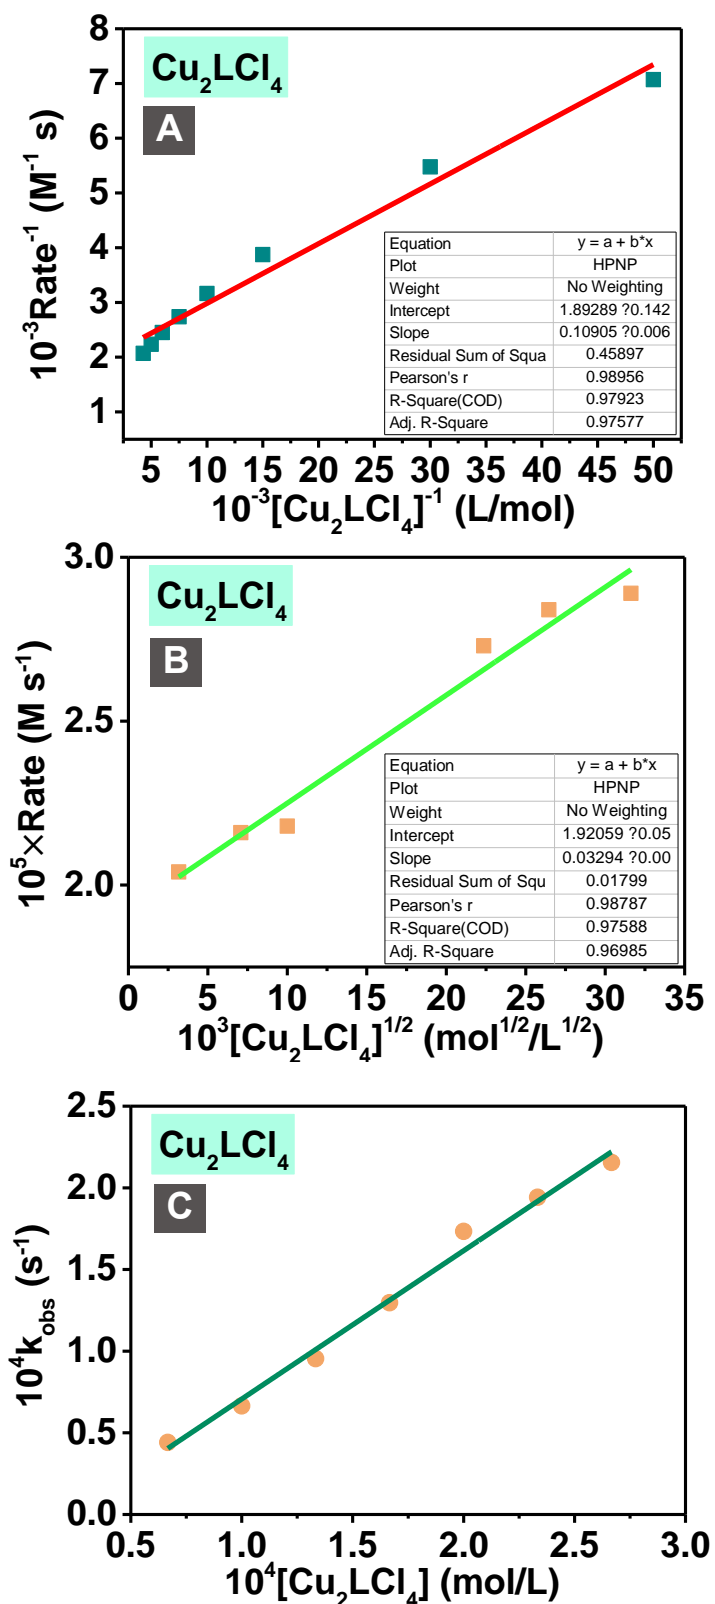

**Figure S7.** The linear rate<sup>-1</sup><sub>oxid</sub> -[Cu<sub>2</sub>LCl<sub>4</sub>]<sup>-1</sup> of the HPNP oxidative cleavage (A), dependence of the transesterification rate of HPNP on the [Cu<sub>2</sub>LCl<sub>4</sub>]<sup>1/2</sup> (B) and k<sub>obs</sub>-[Cu<sub>2</sub>LCl<sub>4</sub>] plot of the oxidative cleavage of BNPP (C).

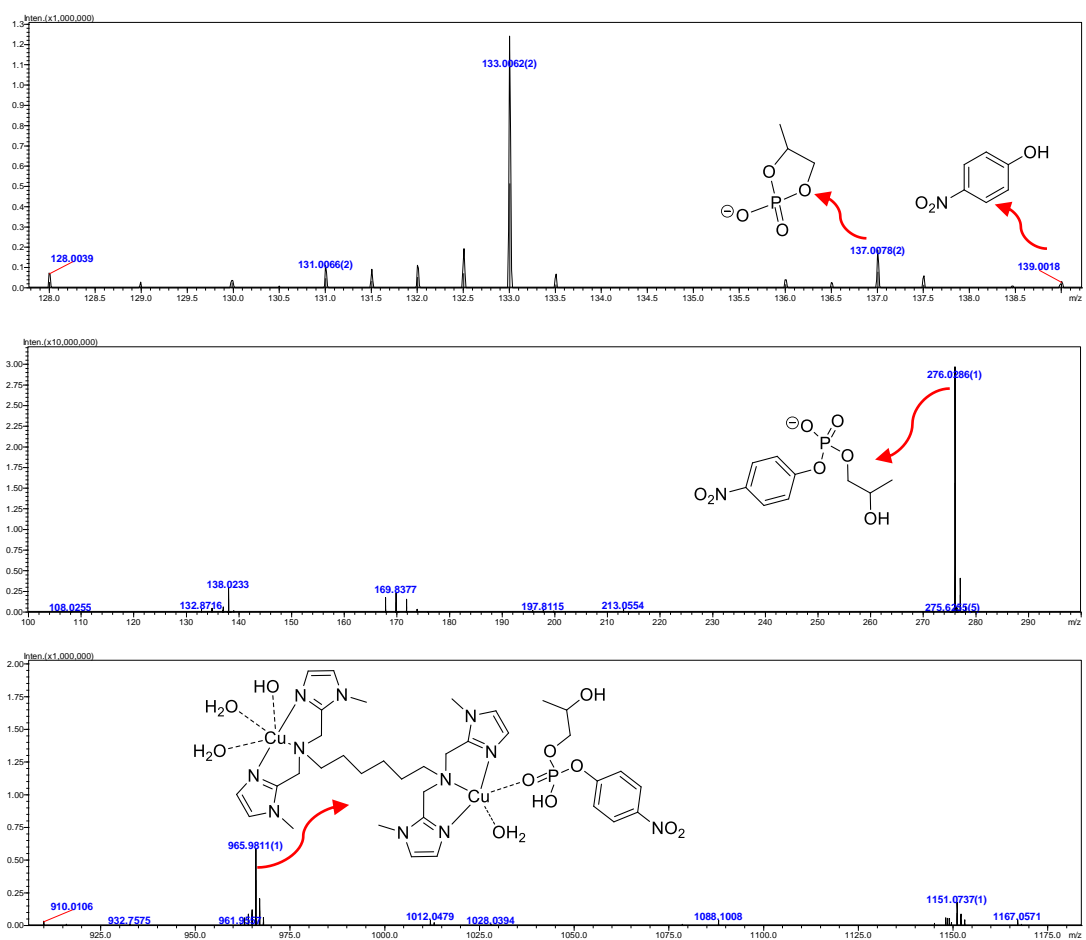

**Figure S8.** Selected ESI-MS spectra of the mixture for the hydrolytic cleavage of HPNP by  $\text{Cu}_2\text{LCl}_4$ .



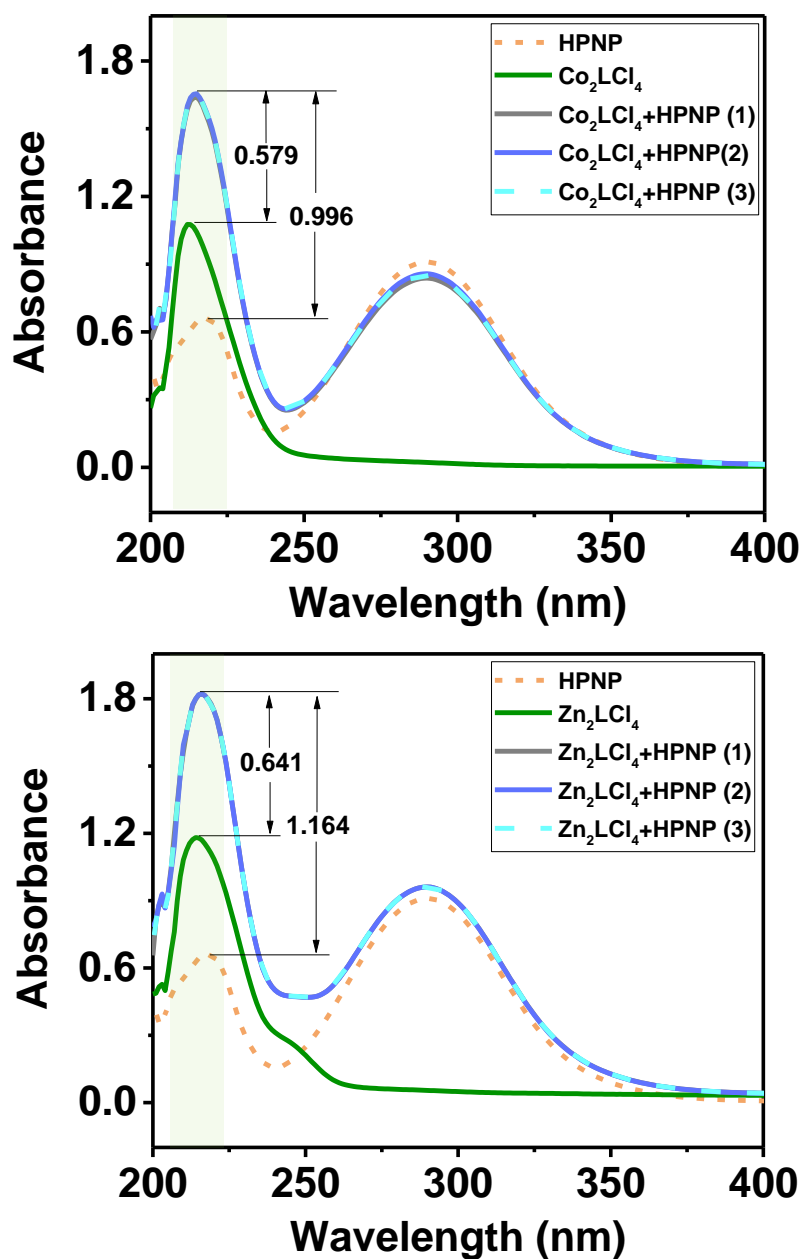

**Figure S9.** UV-vis spectra of the transesterification of HPNP in the presence of Co<sub>2</sub>LCl<sub>4</sub> (Top) or Zn<sub>2</sub>LCl<sub>4</sub> (Low). Numbers (1)-(3) shown in legend indicate different scans for three runs. Conditions: 25 °C, pH 7.00, [HPNP]= 1.0×10<sup>-4</sup> mol/L, [complex]= 5.0×10<sup>-5</sup> mol/L.

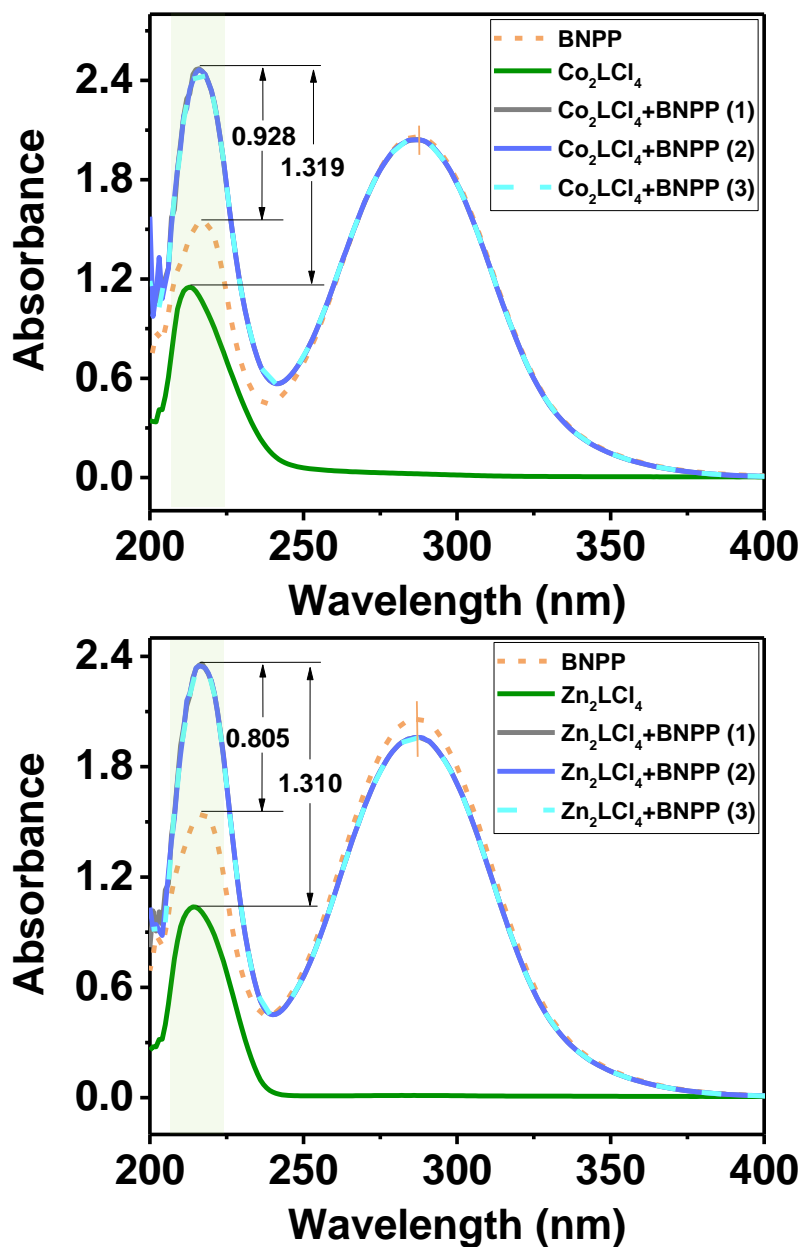

**Figure S10.** UV-vis spectra of the hydrolysis of BNPP in the presence of Co<sub>2</sub>LCl<sub>4</sub> (Top) or Zn<sub>2</sub>LCl<sub>4</sub> (Low). Numbers (1)-(3) shown in legend indicate different scans for three runs. Conditions: 25 °C, pH 7.00, [BNPP]= 1.0×10<sup>-4</sup> mol/L, [complex]= 5.0×10<sup>-5</sup> mol/L.

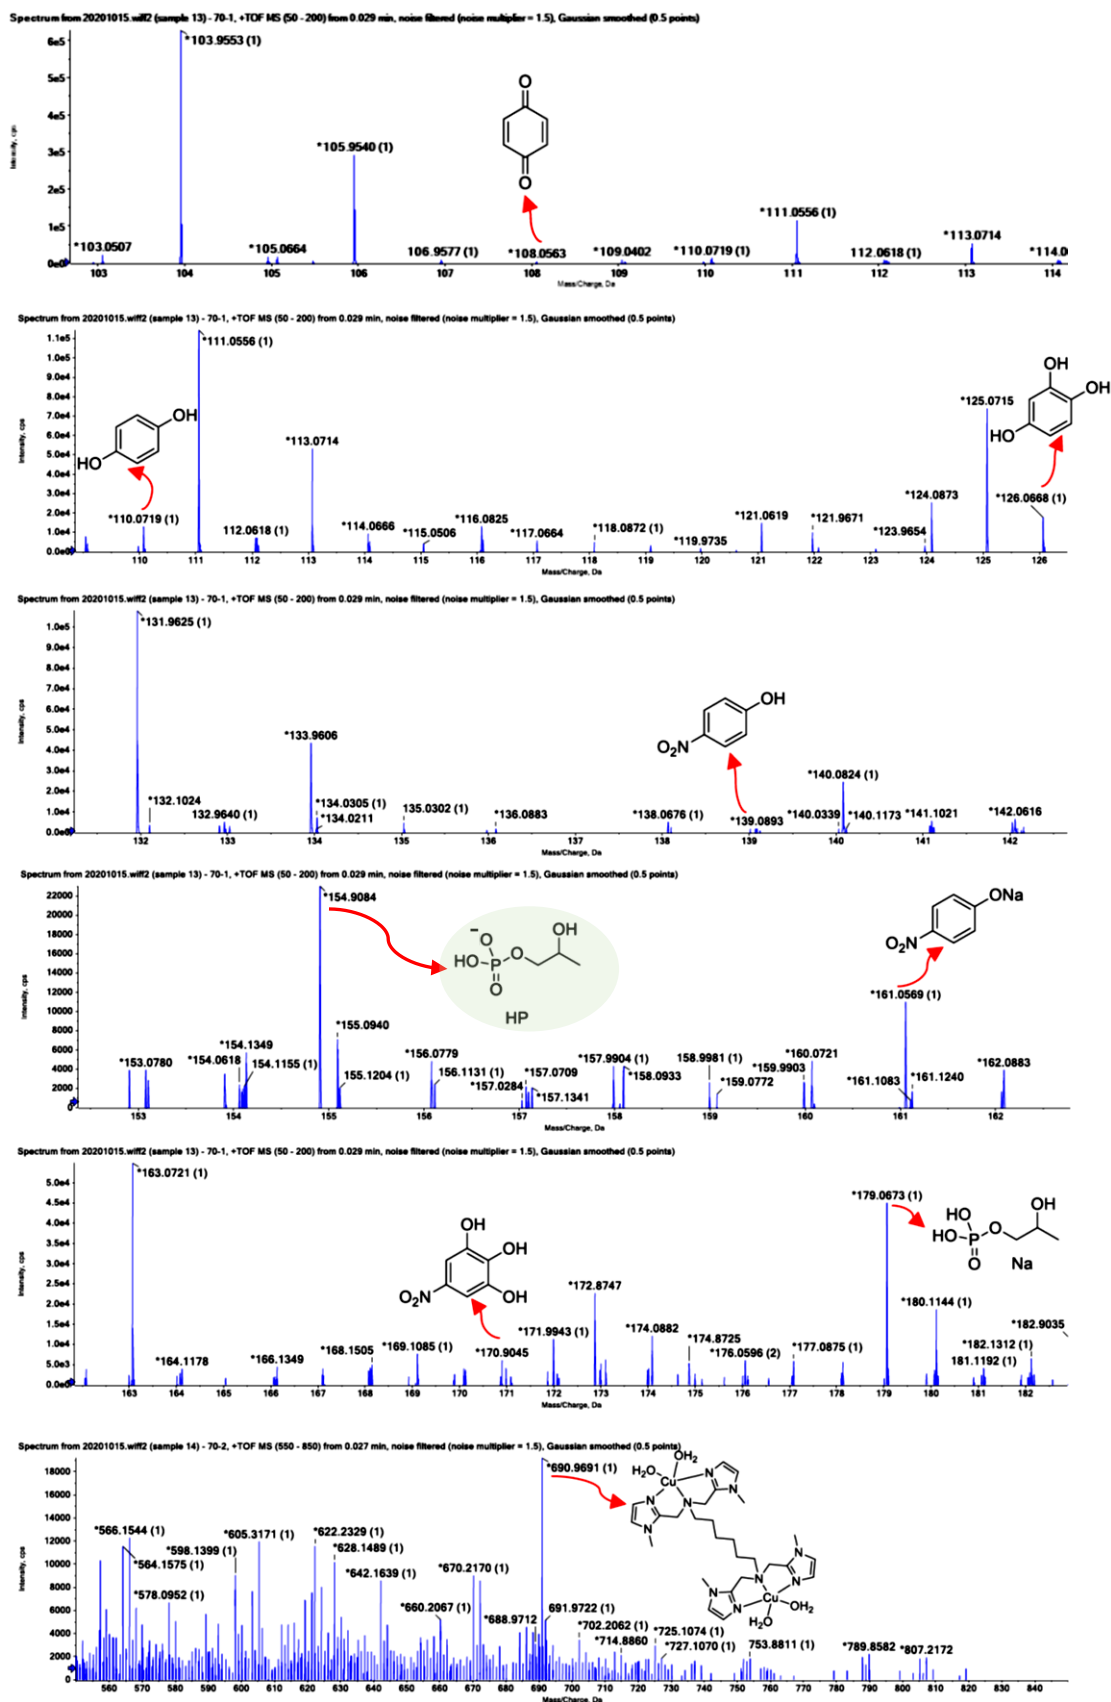

**Figure S11.** Selected ESI-MS spectra of the mixture for the oxidative cleavage of HPNP by  $\text{Cu}_2\text{LCl}_4$  in the presence of  $\text{H}_2\text{O}_2$ .
